# Supplementary material for: Evaluation of Phenolic Profile and Antioxidant Activity of Eleven Pistachio Cultivars (Pistacia vera L.) Cultivated in Andalusia
Source: MDPI journal article supplement (doi:10.3390/antiox11040609), 2022-03-22
Supplement: s1 [file s1]

**SUPPLEMENTARY INFORMATION:**

Evaluation of phenolic profile and antioxidant activity of eleven pistachio cultivars  
(*Pistacia vera* L.) cultivated in Andalusia

José Manuel Moreno-Rojas<sup>1\*</sup>, Isabel Velasco-Ruiz<sup>1</sup>, María Lovera<sup>2</sup>, José Luis Ordoñez-Díaz<sup>1</sup>, Víctor Ortiz-Somovilla<sup>1</sup>, Elsy De Santiago<sup>1\*</sup>, Octavio Arquero<sup>2</sup>, Gema Pereira-Caro<sup>1</sup>

1 Department of Agroindustry and Food Quality Area, Andalusian Institute of Agricultural and Fisheries Research and Training (IFAPA), Alameda del Obispo, Avda. Menéndez-Pidal, s/n. 14004, Córdoba, Spain. elsyg.santiago@juntadeandalucia.es (E.DS.); t72verum@uco.es (I. V.-R); josel.ordonez@juntadeandalucia.es (J.L.O.-D.); mariag.pereira@juntadeandalucia.es (G.P.-C.); victor.ortiz.somovilla@juntadeandalucia.es (V.O.-S.),

2 Department of Agri-Food Engineering and Technology, Andalusian Institute of Agricultural and Fisheries Research and Training (IFAPA), Alameda del Obispo, Avda. Menéndez-Pidal, s/n. 14004, Córdoba, Spain. maria.lovera@juntadeandalucia.es (M.L.); octavio.arquero@juntadeandalucia.es (O.A).

\* Correspondence: josem.moreno.rojas@juntadeandalucia.es

elsyg.santiago@juntadeandalucia.es

**Table S1.** UHPLC-HRMS Characteristics of the polyphenols identified among pistachios varieties

| RT<br>(min)                  | Compound                                 | Chemical Formula                                | [m/z] <sup>-</sup><br>Theoretical | Error<br>(ppm) | MSIMI<br>level <sup>a</sup> |
|------------------------------|------------------------------------------|-------------------------------------------------|-----------------------------------|----------------|-----------------------------|
| <i>Hydroxybenzoic acids</i>  |                                          |                                                 |                                   |                |                             |
| 3.27                         | Gallic acid                              | C <sub>7</sub> H <sub>6</sub> O <sub>5</sub>    | 169.0131                          | -1.18          | 1                           |
| 3.49                         | Pyrogallol (Benzene-1,2-diol)            | C <sub>6</sub> H <sub>5</sub> O <sub>3</sub>    | 125.0233                          | -0.80          | 1                           |
| 3.8                          | Theogallin (3-Galloyl-quinic acid)       | C <sub>14</sub> H <sub>16</sub> O <sub>10</sub> | 343.0663                          | -0.87          | 2                           |
| 6.48                         | 3,4-Dihydroxybenzoic acid                | C <sub>7</sub> H <sub>6</sub> O <sub>4</sub>    | 153.0182                          | -1.31          | 2                           |
| 6.88                         | Galloylshikimic acid                     | C <sub>14</sub> H <sub>14</sub> O <sub>9</sub>  | 325.0554                          | 3.38           | 2                           |
| 8.75                         | Digallic acid                            | C <sub>14</sub> H <sub>10</sub> O <sub>9</sub>  | 321.0241                          | 2.18           | 2                           |
| 8.81                         | Methylgallic acid derivative I           | C <sub>8</sub> H <sub>7</sub> O <sub>5</sub>    | 183.0287                          | 1.64           | 2                           |
| 11.88                        | Methylgallic acid derivative II          | C <sub>8</sub> H <sub>7</sub> O <sub>5</sub>    | 183.0287                          | 1.64           | 2                           |
| 10.09                        | Vanillic acid hexoside                   | C <sub>14</sub> H <sub>18</sub> O <sub>9</sub>  | 329.0867                          | 3.34           | 2                           |
| 11.08                        | Ellagic acid                             | C <sub>14</sub> H <sub>6</sub> O <sub>8</sub>   | 300.9978                          | 2.99           | 1                           |
| 10.46                        | Benzoic acid derivative I                | C <sub>8</sub> H <sub>7</sub> O <sub>4</sub>    | 167.0338                          | 2.39           | 1                           |
| 11.97                        | Benzoic acid derivative II               | C <sub>8</sub> H <sub>7</sub> O <sub>4</sub>    | 167.0338                          | 2.39           | 1                           |
| 14.04                        | Benzoic acid derivative III              | C <sub>8</sub> H <sub>7</sub> O <sub>4</sub>    | 167.0338                          | 2.39           | 1                           |
| <i>Galloyl derivatives</i>   |                                          |                                                 |                                   |                |                             |
| 2.67                         | Mono-galloyl-glucose I                   | C <sub>13</sub> H <sub>16</sub> O <sub>10</sub> | 331.0659                          | 3.02           | 2                           |
| 6.63                         | Mono-galloyl-glucose II                  | C <sub>13</sub> H <sub>16</sub> O <sub>10</sub> | 331.0659                          | 3.02           | 2                           |
| 3.6                          | Galloyl dihexose                         | C <sub>19</sub> H <sub>26</sub> O <sub>15</sub> | 493.1188                          | 0.20           | 2                           |
| 8.46                         | Digalloyl hexose I                       | C <sub>20</sub> H <sub>20</sub> O <sub>14</sub> | 483.0769                          | 2.28           | 2                           |
| 9.02                         | Digalloyl hexose II                      | C <sub>20</sub> H <sub>20</sub> O <sub>14</sub> | 483.0769                          | 2.28           | 2                           |
| 9.05                         | Hydroxy-methoxyphenylgalloyl hexoside I  | C <sub>20</sub> H <sub>22</sub> O <sub>12</sub> | 453.1027                          | 2.43           | 2                           |
| 9.75                         | Hydroxy-methoxyphenylgalloyl hexoside II | C <sub>20</sub> H <sub>22</sub> O <sub>12</sub> | 453.1027                          | 2.43           | 2                           |
| 9.96                         | Tetra-O-galloyl glucoside I              | C <sub>34</sub> H <sub>28</sub> O <sub>19</sub> | 787.0994                          | 1.40           | 2                           |
| 10.7                         | Tetra-O-galloyl glucoside II             | C <sub>34</sub> H <sub>28</sub> O <sub>19</sub> | 787.0994                          | 1.40           | 2                           |
| 11.23                        | Pentagalloylglucose                      | C <sub>41</sub> H <sub>32</sub> O <sub>26</sub> | 939.1098                          | 0.64           | 2                           |
| <i>Hydroxycinnamic acids</i> |                                          |                                                 |                                   |                |                             |
| 8.19                         | Chlorogenic acid I                       | C <sub>16</sub> H <sub>18</sub> O <sub>9</sub>  | 353.0867                          | 0.28           | 1                           |
| 9.17                         | Chlorogenic acid II                      | C <sub>16</sub> H <sub>18</sub> O <sub>9</sub>  | 353.0867                          | 0.28           | 1                           |
| 8.59                         | Ferulic acid derivative                  | C <sub>10</sub> H <sub>10</sub> O <sub>4</sub>  | 193.0516                          | 1.55           | 1                           |
| 9.02                         | Sinapic acid derivative                  | C <sub>11</sub> H <sub>12</sub> O <sub>5</sub>  | 223.0600                          | 2.24           | 1                           |
| 10.83                        | <i>p</i> -Coumaric acid                  | C <sub>9</sub> H <sub>8</sub> O <sub>3</sub>    | 163.0395                          | 0.61           | 1                           |

*Flavones*

|       |                   |                                                 |          |      |   |
|-------|-------------------|-------------------------------------------------|----------|------|---|
| 8.65  | Luteolin hexoside | C <sub>21</sub> H <sub>20</sub> O <sub>11</sub> | 447.0921 | 1.79 | 2 |
| 14.27 | Luteolin          | C <sub>15</sub> H <sub>10</sub> O <sub>6</sub>  | 285.0393 | 3.16 | 1 |
| 11.14 | Apigenin hexoside | C <sub>21</sub> H <sub>20</sub> O <sub>10</sub> | 431.0972 | 1.16 | 2 |
| 13.71 | Apigenin          | C <sub>15</sub> H <sub>10</sub> O <sub>5</sub>  | 269.0444 | 3.35 | 2 |

*Flavonols*

|       |                                |                                                 |          |      |   |
|-------|--------------------------------|-------------------------------------------------|----------|------|---|
| 10.87 | Rutin                          | C <sub>27</sub> H <sub>30</sub> O <sub>16</sub> | 609.145  | 0.82 | 1 |
| 10.35 | Myricetin hexoside             | C <sub>21</sub> H <sub>20</sub> O <sub>13</sub> | 479.082  | 1.67 | 2 |
| 12.65 | Myricetin                      | C <sub>15</sub> H <sub>10</sub> O <sub>8</sub>  | 317.0291 | 1.89 | 1 |
| 10.69 | Quercetin hexoside I           | C <sub>21</sub> H <sub>20</sub> O <sub>12</sub> | 463.0871 | 1.73 | 2 |
| 11.15 | Quercetin hexoside II          | C <sub>21</sub> H <sub>20</sub> O <sub>12</sub> | 463.0871 | 1.73 | 2 |
| 10.76 | Quercetin galloyl glucoside I  | C <sub>28</sub> H <sub>24</sub> O <sub>16</sub> | 615.098  | 1.46 | 2 |
| 11.57 | Quercetin galloyl glucoside II | C <sub>28</sub> H <sub>24</sub> O <sub>16</sub> | 615.098  | 1.46 | 2 |
| 14.32 | Quercetin                      | C <sub>15</sub> H <sub>10</sub> O <sub>7</sub>  | 301.0342 | 3.32 | 1 |
| 14.85 | Isorhamnetin                   | C <sub>16</sub> H <sub>12</sub> O <sub>7</sub>  | 315.0499 | 4.76 | 1 |

*Flavan-3-ols*

|       |                          |                                                 |          |      |   |
|-------|--------------------------|-------------------------------------------------|----------|------|---|
| 6.72  | Gallocatechin            | C <sub>15</sub> H <sub>14</sub> O <sub>7</sub>  | 305.0655 | 3.61 | 2 |
| 8.81  | Catechin                 | C <sub>15</sub> H <sub>14</sub> O <sub>6</sub>  | 289.0707 | 2.77 | 1 |
| 9.69  | Epicatechin              | C <sub>15</sub> H <sub>14</sub> O <sub>6</sub>  | 289.0707 | 2.42 | 2 |
| 9.82  | Epigallocatechin gallate | C <sub>22</sub> H <sub>18</sub> O <sub>11</sub> | 457.0765 | 0.44 | 1 |
| 11.18 | Epicatechin gallate      | C <sub>22</sub> H <sub>18</sub> O <sub>10</sub> | 441.0816 | 2.27 | 1 |
| 12.05 | Epiafzelechin 3-gallate  | C <sub>22</sub> H <sub>18</sub> O <sub>9</sub>  | 425.0867 | 1.88 | 2 |
| 12.64 | Afzelechin I             | C <sub>15</sub> H <sub>14</sub> O <sub>5</sub>  | 273.0757 | 2.93 | 2 |
| 13.14 | Afzelechin II            | C <sub>15</sub> H <sub>14</sub> O <sub>5</sub>  | 273.0757 | 2.93 | 2 |
| 15.47 | Afzelechin III           | C <sub>15</sub> H <sub>14</sub> O <sub>5</sub>  | 273.0757 | 2.93 | 2 |

*Flavanones*

|       |                      |                                                 |          |      |   |
|-------|----------------------|-------------------------------------------------|----------|------|---|
| 11.2  | Eriodictyol hexoside | C <sub>21</sub> H <sub>22</sub> O <sub>11</sub> | 449.1078 | 1.11 | 2 |
| 14.07 | Eriodictyol          | C <sub>15</sub> H <sub>12</sub> O <sub>6</sub>  | 287.055  | 2.79 | 2 |
| 12.18 | Naringenin hexoside  | C <sub>21</sub> H <sub>22</sub> O <sub>10</sub> | 433.1129 | 1.39 | 2 |
| 15.59 | Naringenin           | C <sub>15</sub> H <sub>12</sub> O <sub>5</sub>  | 271.0601 | 3.32 | 2 |

*Flavanonols*

|       |           |                                                |          |      |   |
|-------|-----------|------------------------------------------------|----------|------|---|
| 11.59 | Taxifolin | C <sub>15</sub> H <sub>12</sub> O <sub>7</sub> | 303.0499 | 3.63 | 2 |
|-------|-----------|------------------------------------------------|----------|------|---|

*Stilbenes*

|       |                      |                   |          |      |   |
|-------|----------------------|-------------------|----------|------|---|
| 11.04 | Resveratrol hexoside | $C_{20}H_{22}O_8$ | 389.1231 | 2.31 | 2 |
|-------|----------------------|-------------------|----------|------|---|

---

<sup>a</sup> Annotation from the Summer et al. Compounds identified at MSIMI level 1 means there was a commercially available standard. Compounds identified at MSIMSI level 2 means it was tentatively identified. RT: retention time.

**Table S2.** Influence of the cultivar and harvesting season on the galloyl derivatives group ( $\mu\text{g}/100\text{ g}$ )

|                                 | Mono-galloyl-glucose I | Mono-galloyl-glucose II | Galloyl dihexose | Digalloyl hexose I | Digalloyl hexose II | Hydroxy-methoxy phenyl galloyl hexoside I | Hydroxy-methoxy phenyl galloyl hexoside II | Tetra-O-galloyl glucoside I | Tetra-O-galloyl glucoside II | Penta galloyl glucose | Total   |
|---------------------------------|------------------------|-------------------------|------------------|--------------------|---------------------|-------------------------------------------|--------------------------------------------|-----------------------------|------------------------------|-----------------------|---------|
| <b>Values<sup>a</sup></b>       |                        |                         |                  |                    |                     |                                           |                                            |                             |                              |                       |         |
| <b><u>Variety</u></b>           |                        |                         |                  |                    |                     |                                           |                                            |                             |                              |                       |         |
| Aegina                          | 0.32 cd                | 2.01 ab                 | 0.27 abc         | 0.18 bc            | 0.14 ab             | 0.178 cd                                  | 0.49 b                                     | 0.134 a                     | 0.73 ab                      | 0.58 ab               | 5.0 abc |
| Avdat                           | 0.47 cd                | 1.90 ab                 | 0.22 abc         | 0.20 bc            | 0.14 ab             | 0.26 4b                                   | 0.52 ab                                    | 0.124 b                     | 0.64 bc                      | 0.55 bc               | 5.0 abc |
| Golden Hills                    | 0.63 cd                | 1.95 ab                 | 0.30 a           | 0.15 bc            | 0.22 ab             | 0.128 efg                                 | 0.15 c                                     | 0.099 d                     | 0.31 de                      | 0.23 de               | 4.2 bcd |
| Joley                           | 0.20 d                 | 1.51 bc                 | 0.21 bc          | 0.20 bc            | 0.14 ab             | 0.143 def                                 | 0.19 c                                     | 0.109 c                     | 0.38 d                       | 0.29 d                | 3.4 d   |
| Kaleghouchi                     | 0.23 cd                | 1.77 b                  | 0.27 abc         | 0.13 c             | 0.11 b              | 0.094 g                                   | 0.10 c                                     | 0.097 d                     | 0.23 e                       | 0.16 e                | 3.2 d   |
| Kastel                          | 1.32 ab                | 2.46 a                  | 0.26 abc         | 0.18 bc            | 0.13 ab             | 0.099 fg                                  | 0.12 c                                     | 0.098 d                     | 0.37 d                       | 0.25 de               | 5.3 ab  |
| Kerman                          | 1.96 a                 | 2.15 ab                 | 0.28 ab          | 0.32 a             | 0.26 a              | 0.152 de                                  | 0.24 c                                     | 0.099 d                     | 0.43 d                       | 0.29 d                | 6.2 a   |
| Larnaka                         | 0.88 bc                | 2.01 ab                 | 0.24 abc         | 0.22 b             | 0.15 ab             | 0.354 a                                   | 0.61 ab                                    | 0.130 ab                    | 0.7 6ab                      | 0.67 a                | 6.0 a   |
| Lost Hills                      | 0.35 cd                | 1.52 bc                 | 0.27 ab          | 0.16 bc            | 0.16 ab             | 0.130 efg                                 | 0.18 c                                     | 0.104 cd                    | 0.43 d                       | 0.33 d                | 3.6 cd  |
| Mateur                          | 0.42 cd                | 2.00 ab                 | 0.27 abc         | 0.20 bc            | 0.15 ab             | 0.177 cd                                  | 0.54 ab                                    | 0.132 ab                    | 0.79 a                       | 0.63 ab               | 5.3 ab  |
| Sirora                          | 0.76 bcd               | 0.95 c                  | 0.19 c           | 0.21 b             | 0.13 ab             | 0.209 c                                   | 0.68 a                                     | 0.112 c                     | 0.58 c                       | 0.48 c                | 4.3 bcd |
| <b><u>Season</u></b>            |                        |                         |                  |                    |                     |                                           |                                            |                             |                              |                       |         |
| 2019                            | 0.51 b                 | 1.89                    | 0.26             | 0.18 b             | 0.15                | 0.159 b                                   | 0.31 b                                     | 0.117 a                     | 0.51                         | 0.41                  | 4.5     |
| 2020                            | 0.86 a                 | 1.79                    | 0.24             | 0.21 a             | 0.16                | 0.191 a                                   | 0.38 a                                     | 0.108 b                     | 0.51                         | 0.41                  | 4.9     |
| <b>Significance<sup>b</sup></b> |                        |                         |                  |                    |                     |                                           |                                            |                             |                              |                       |         |
| Variety (V)                     | ***                    | ***                     | ***              | ***                | *                   | ***                                       | ***                                        | ***                         | ***                          | ***                   | ***     |
| Season (S)                      | ***                    | ns                      | ns               | *                  | ns                  | ***                                       | **                                         | ***                         | ns                           | ns                    | ns      |
| V x S                           | *                      | ns                      | ns               | ***                | ns                  | *                                         | ***                                        | **                          | ***                          | **                    | *       |

<sup>a</sup>Average values. <sup>b</sup>Level of significance: \* $p \leq 0.05$ , \*\* $p \leq 0.01$ , \*\*\* $p \leq 0.001$ , ns: non-significant. Values with different letters are significantly different as determined through Tukey test.

**Table S3.** Influence of the cultivar and harvesting season on the hydroxycinnamic acids group ( $\mu\text{g}/100\text{ g}$ )

|                                 | Chlorogenic acid I | Chlorogenic acid II | Ferulic acid derivative | Sinapic acid derivative | p-Coumaric acid | Total   |
|---------------------------------|--------------------|---------------------|-------------------------|-------------------------|-----------------|---------|
| <b>Values<sup>a</sup></b>       |                    |                     |                         |                         |                 |         |
| <b><u>Variety</u></b>           |                    |                     |                         |                         |                 |         |
| Aegina                          | 0.152 abc          | 0.156 b             | < LOQ b                 | 0.035 cd                | < LOQ           | 0.344 b |
| Avdat                           | 0.155 a            | 0.155 bc            | < LOQ b                 | 0.091 a                 | < LOQ           | 0.399 b |
| Golden Hills                    | 0.147 d            | 0.154 bcd           | < LOQ b                 | 0.063 b                 | < LOQ           | 0.365 b |
| Joley                           | 0.152 abc          | 0.150 de            | < LOQ b                 | 0.030 cd                | < LOQ           | 0.328 b |
| Kaleghouchi                     | 0.149 bcd          | 0.153 bcde          | < LOQ b                 | 0.006 e                 | < LOQ           | 0.308 b |
| Kastel                          | 0.148 cd           | 0.149 e             | 3.065 a                 | 0.040 c                 | < LOQ           | 1.870 a |
| Kerman                          | 0.147 d            | 0.155 bc            | < LOQ b                 | 0.007 e                 | < LOQ           | 0.308 b |
| Larnaka                         | 0.153 ab           | 0.153 bcde          | < LOQ b                 | 0.073 ab                | < LOQ           | 0.379 b |
| Lost Hills                      | 0.146 d            | 0.156 b             | < LOQ b                 | 0.007 e                 | < LOQ           | 0.310 b |
| Mateur                          | 0.149 bcd          | 0.161 a             | < LOQ b                 | 0.017 de                | < LOQ           | 0.327 b |
| Sirora                          | 0.146 d            | 0.151 cde           | < LOQ b                 | 0.035 cd                | < LOQ           | 0.332 b |
| <b><u>Season</u></b>            |                    |                     |                         |                         |                 |         |
| 2019                            | 0.150              | 0.155 a             | 3.065 a                 | 0.050 a                 | < LOQ           | 0.632 a |
| 2020                            | 0.149              | 0.153 b             | < LOQ b                 | 0.024 b                 | < LOQ           | 0.325 b |
| <b>Significance<sup>b</sup></b> |                    |                     |                         |                         |                 |         |
| Variety (V)                     | ***                | ***                 | ***                     | ***                     | ns              | ***     |
| Season (S)                      | ns                 | *                   | ***                     | ***                     | ns              | ***     |
| V x S                           | *                  | ns                  | ***                     | ***                     | ns              | ***     |

<sup>a</sup>Average values. <sup>b</sup>Level of significance: \* $p \leq 0.05$ , \*\* $p \leq 0.01$ , \*\*\* $p \leq 0.001$ , ns: non-significant. Values with different letters are significantly different as determined through Tukey test.

**Table S4.** Influence of the cultivar and harvesting season on the flavones group (µg/100 g)

|                                 | Luteolin<br>hexoside | Luteolin  | Apigenin<br>hexoside | Apigenin  | Total     |
|---------------------------------|----------------------|-----------|----------------------|-----------|-----------|
| <b>Values<sup>a</sup></b>       |                      |           |                      |           |           |
| <b><u>Variety</u></b>           |                      |           |                      |           |           |
| Aegina                          | 3.28 abc             | 0.024 e   | < LOQ                | 0.012 ab  | 3.31 ab   |
| Avdat                           | 4.09 ab              | 0.016 e   | < LOQ                | 0.008 c   | 4.12 a    |
| Golden Hills                    | 0.32 g               | 0.109 cde | < LOQ                | 0.011 abc | 0.44 f    |
| Joley                           | 1.97 def             | 0.066 de  | < LOQ                | 0.008 bc  | 2.04 cde  |
| Kaleghouchi                     | 2.01 def             | 0.294 b   | < LOQ                | 0.009 abc | 2.32 bcde |
| Kastel                          | 1.76 ef              | 0.191 bc  | < LOQ                | 0.009 abc | 1.96 de   |
| Kerman                          | 1.87 ef              | 0.144 cd  | < LOQ                | 0.011 abc | 2.03 cde  |
| Larnaka                         | 4.33 a               | 0.017 e   | < LOQ                | 0.009 abc | 4.36 a    |
| Lost Hills                      | 0.87 fg              | 0.519 a   | < LOQ                | 0.011 abc | 1.40 ef   |
| Mateur                          | 2.87 cde             | 0.032 de  | < LOQ                | 0.012 a   | 2.91 bcd  |
| Sirora                          | 3.07 bcd             | 0.102 cde | < LOQ                | 0.008 bc  | 3.18 abc  |
| <b><u>Season</u></b>            | 3.28 abc             | 0.024 e   | < LOQ                | 0.012 ab  | 3.31 ab   |
| 2019                            | 1.89 b               | 0.122 b   | < LOQ                | 0.011 a   | 2.03 b    |
| 2020                            | 2.91 a               | 0.153 a   | < LOQ                | 0.009 b   | 3.08 a    |
| <b>Significance<sup>b</sup></b> |                      |           |                      |           |           |
| Variety (V)                     | ***                  | ***       | ns                   | ***       | ***       |
| Season (S)                      | ***                  | *         | ns                   | *         | ***       |
| V x S                           | **                   | ***       | ns                   | ns        | **        |

<sup>a</sup>Average values. <sup>b</sup>Level of significance: \*p ≤ 0.05, \*\*p ≤ 0.01, \*\*\*p ≤ 0.001, ns: non-significant.

Values with different letters are significantly different as determined through Tukey test.

**Table S5.** Influence of the cultivar and harvesting season on the flavonols group (µg/100 g)

|                                 | Rutin    | Myricetin<br>hexoside | Myricetin | Quercetin<br>hexoside I | Quercetin<br>hexoside II | Quercetin<br>galloyl<br>glucoside I | Quercetin<br>galloyl<br>glucoside II | Quercetin | Isorhamnetin | Total     |
|---------------------------------|----------|-----------------------|-----------|-------------------------|--------------------------|-------------------------------------|--------------------------------------|-----------|--------------|-----------|
| <b>Values<sup>a</sup></b>       |          |                       |           |                         |                          |                                     |                                      |           |              |           |
| <b><u>Variety</u></b>           |          |                       |           |                         |                          |                                     |                                      |           |              |           |
| Aegina                          | 0.37 bc  | 0.69 a                | 0.038 ab  | 0.226 a                 | 2.71 a                   | 0.071 d                             | 0.019 ab                             | 0.17 b    | 0.012        | 4.31 a    |
| Avdat                           | 0.31 cde | 0.60 ab               | 0.025 bcd | 0.180 abc               | 2.49 ab                  | 0.195 b                             | 0.005 cd                             | 0.13 b    | 0.010        | 3.95 abcd |
| Golden Hills                    | 0.23 f   | 0.14 d                | 0.020 cd  | 0.089 de                | 1.21 d                   | 0.003 e                             | 0.005 cd                             | 0.19 b    | 0.013        | 1.89 f    |
| Joley                           | 0.61 a   | 0.16 d                | 0.012 d   | 0.126 cd                | 2.00 bc                  | 0.091 cd                            | < LOQ                                | 0.14 b    | 0.012        | 3.14 de   |
| Kaleghouchi                     | 0.27 def | 0.36 c                | 0.026 bcd | 0.043 e                 | 1.49 cd                  | 0.138 c                             | nd                                   | 0.15 b    | 0.010        | 2.49 ef   |
| Kastel                          | 0.22 f   | 0.41 c                | 0.027 bcd | 0.151 bcd               | 1.52 cd                  | 0.011 e                             | < LOQ                                | 0.13 b    | 0.012        | 2.49 ef   |
| Kerman                          | 0.26 ef  | 0.45 bc               | 0.021 cd  | 0.144 bcd               | 2.35 ab                  | 0.043 de                            | < LOQ                                | 0.14 b    | 0.015        | 3.42 bcd  |
| Larnaka                         | 0.32 bcd | 0.63 a                | 0.031 bc  | 0.187 abc               | 2.57 ab                  | 0.288 a                             | 0.015 ab                             | 0.16 b    | 0.012        | 4.22 abc  |
| Lost Hills                      | 0.25 ef  | 0.12 d                | 0.019 cd  | 0.161 abcd              | 2.29 ab                  | 0.000 e                             | 0.005 cd                             | 0.28 a    | 0.017        | 3.15 de   |
| Mateur                          | 0.38 b   | 0.76 a                | 0.052 a   | 0.201 ab                | 2.59 ab                  | 0.075 d                             | 0.023 a                              | 0.19 ab   | 0.018        | 4.30 ab   |
| Sirora                          | 0.33 bcd | 0.37 c                | 0.018 cd  | 0.126 cd                | 2.35 ab                  | 0.017 e                             | 0.011 bc                             | 0.15 b    | 0.013        | 3.38 cd   |
| <b><u>Season</u></b>            | 0.37 bc  | 0.69 a                | 0.038 ab  | 0.226 a                 | 2.71 a                   | 0.071 d                             | 0.019 ab                             | 0.17 b    | 0.012        | 4.31 a    |
| 2019                            | 0.35 a   | 0.37 b                | 0.017 b   | 0.142                   | 2.05 b                   | 0.072 b                             | 0.003 b                              | 0.15 b    | 0.010 b      | 3.16 b    |
| 2020                            | 0.30 b   | 0.49 a                | 0.035 a   | 0.155                   | 2.24 a                   | 0.098 a                             | 0.012 a                              | 0.18 a    | 0.016 a      | 3.52 a    |
| <b>Significance<sup>b</sup></b> | 0.35 a   | 0.37 b                | 0.017 b   | 0.142                   | 2.05 b                   | 0.072 b                             | 0.003 b                              | 0.15 b    | 0.010 b      | 3.16 b    |
| Variety (V)                     | ***      | ***                   | ***       | ***                     | ***                      | ***                                 | ***                                  | ***       | ns           | ***       |
| Season (S)                      | ***      | ***                   | ***       | ns                      | *                        | ***                                 | ***                                  | **        | ***          | **        |
| V x S                           | ***      | ***                   | ***       | *                       | *                        | ns                                  | ***                                  | ns        | *            | **        |

<sup>a</sup>Average values. <sup>b</sup>Level of significance: \*p ≤ 0.05, \*\*p ≤ 0.01, \*\*\*p ≤ 0.001, ns: non-significant.  
Values with different letters are significantly different as determined through Tukey test.



**Table S6.** Influence of the cultivar and harvesting season on the flavanones group ( $\mu\text{g}/100\text{ g}$ )

|                                 | Eriodictyol<br>hexoside | Eriodictyol | Naringenin<br>hexoside | Naringenin | Total   |
|---------------------------------|-------------------------|-------------|------------------------|------------|---------|
| <b>Values<sup>a</sup></b>       |                         |             |                        |            |         |
| <b><u>Variety</u></b>           |                         |             |                        |            |         |
| Aegina                          | 6.7 3a                  | 1.04 a      | 0.286 a                | 0.043 bcd  | 8.10 a  |
| Avdat                           | 5.04 b                  | 0.89 ab     | 0.273 a                | 0.049 b    | 6.24 b  |
| Golden Hills                    | 0.90 c                  | 0.32 d      | 0.063 b                | 0.049 b    | 1.34 cd |
| Joley                           | 4.05 b                  | 0.85 abc    | 0.256 a                | 0.069 a    | 5.22 b  |
| Kaleghouchi                     | 0.91 c                  | 0.58 bcd    | 0.054 b                | 0.052 b    | 1.60 cd |
| Kastel                          | 0.77 c                  | 0.21 d      | 0.037 b                | 0.026 e    | 1.05 d  |
| Kerman                          | 1.32 c                  | 0.32 d      | 0.059 b                | 0.022 e    | 1.72 cd |
| Larnaka                         | 4.88 b                  | 0.86 abc    | 0.253 a                | 0.046 bcd  | 6.04 b  |
| Lost Hills                      | 1.13 c                  | 0.48 cd     | 0.066 b                | 0.034 cde  | 1.70 cd |
| Mateur                          | 6.92 a                  | 1.03 a      | 0.311 a                | 0.047 bc   | 8.31 a  |
| Sirora                          | 1.76 c                  | 0.55 bcd    | 0.079 b                | 0.033 de   | 2.42 c  |
| <b><u>Season</u></b>            |                         |             |                        |            |         |
| 2019                            | 2.83 b                  | 0.71 a      | 0.144 b                | 0.042      | 3.73 b  |
| 2020                            | 3.42 a                  | 0.58 b      | 0.172 a                | 0.044      | 4.22 a  |
| <b>Significance<sup>b</sup></b> |                         |             |                        |            |         |
| Variety (V)                     | ***                     | ***         | ***                    | ***        | ***     |
| Season (S)                      | ***                     | *           | **                     | ns         | **      |
| V x S                           | ***                     | ns          | ***                    | *          | ***     |

<sup>a</sup>Average values. <sup>b</sup>Level of significance: \* $p \leq 0.05$ , \*\* $p \leq 0.01$ , \*\*\* $p \leq 0.001$ , ns: non-significant.

Values with different letters are significantly different as determined through Tukey test.

**Table S7.** Influence of the cultivar and harvesting season on the flavanonols group (µg/100 g)

| Taxifolin                       |        |
|---------------------------------|--------|
| <b>Values<sup>a</sup></b>       |        |
| <b><u>Variety</u></b>           |        |
| Aegina                          | 1.15   |
| Avdat                           | 0.90   |
| Golden Hills                    | 0.44   |
| Joley                           | 0.68   |
| Kalehghouchi                    | 1.23   |
| Kastel                          | 0.46   |
| Kerman                          | 0.83   |
| Larnaka                         | 0.76   |
| Lost Hills                      | 0.78   |
| Mateur                          | 0.95   |
| Sirora                          | 0.88   |
| <b><u>Season</u></b>            |        |
| 2019                            | 1.11 a |
| 2020                            | 0.54 b |
| <b>Significance<sup>b</sup></b> |        |
| Variety (V)                     | ns     |
| Season (S)                      | ***    |
| V x S                           | ns     |

<sup>a</sup>Average values. <sup>b</sup>Level of significance: \*p ≤ 0.05, \*\*p ≤ 0.01, \*\*\*p ≤ 0.001, ns: non-significant. Values with different letters are significantly different as determined through Tukey test.

**Table S8.** Influence of the cultivar and harvesting season on the stilbenes group (µg/100 g)

|                                 | Resveratrol<br>hexoside |
|---------------------------------|-------------------------|
| <b>Values<sup>a</sup></b>       |                         |
| <b><u>Variety</u></b>           |                         |
| Aegina                          | 4.20 b                  |
| Avdat                           | 5.22 a                  |
| Golden Hills                    | 1.40 d                  |
| Joley                           | 2.12 cd                 |
| Kalehghouchi                    | 1.66 cd                 |
| Kastel                          | 2.00 cd                 |
| Kerman                          | 2.47 c                  |
| Larnaka                         | 4.92 ab                 |
| Lost Hills                      | 1.88 cd                 |
| Mateur                          | 4.08 b                  |
| Sirora                          | 2.41 c                  |
| <b><u>Season</u></b>            |                         |
| 2019                            | 2.81 b                  |
| 2020                            | 3.08 a                  |
| <b>Significance<sup>b</sup></b> |                         |
| Variety (V)                     | ***                     |
| Season (S)                      | *                       |
| V x S                           | *                       |

<sup>a</sup>Average values. <sup>b</sup>Level of significance: \*p ≤ 0.05, \*\*p ≤ 0.01, \*\*\*p ≤ 0.001, ns: non-significant.  
Values with different letters are significantly different as determined through Tukey test.
